# Supplementary material for: Association of occupational heat exposure and colorectal cancer in the MCC-Spain study
Source: PubMed Central journal article supplement (PMC10621896; doi:10.5271/sjweh.4082), 2023-03-30
Supplement: SJWEH-49-211-S001.pdf [file SJWEH-49-211-S001.pdf]

## **Association of occupational heat exposure and colorectal cancer in the MCC-Spain study<sup>1</sup>**

by Alice Hinchliffe, MSc, Manolis Kogevinas, PhD, Antonio J Molina, PhD, Victor Moreno, PhD, Nuria Aragonés, PhD, Gemma Castaño-Vinyals, PhD, José Juan Jiménez Moleón, PhD, Inés Gómez Acebo, PhD, María Ederra, PhD, Pilar Amiano, PhD, Ana Molina-Barceló, PhD, Guillermo Fernandez-Tardon, PhD, Juan Alguacil, PhD, María-Dolores Chirlaque, PhD, Natalia Hernández-Segura, MSc, Beatriz Pérez-Gómez, PhD, Marina Pollan, PhD, Michelle C Turner, PhD <sup>2</sup>

1. Supplementary material.
2. Correspondence to: Michelle C. Turner, ISGlobal, Barcelona Institute for Global Health, Parc de Recerca Biomèdica de Barcelona, Doctor Aiguader, 88 Barcelona 08003 Spain. [E-mail: [michelle.turner@isglobal.org](mailto:michelle.turner@isglobal.org)] ORCID: 0000-0002-6431-1997

**Table S1.** Distributions of risk factors among controls ever and never occupationally exposed to heat

|                                            | <b>Ever heat (N=984)</b> | <b>Never heat (N=1,706)</b> | <b><i>p-values</i></b> |
|--------------------------------------------|--------------------------|-----------------------------|------------------------|
|                                            | <b>N(%)</b>              | <b>N(%)</b>                 |                        |
| <b>Age; mean (SD)</b>                      | 63.8 (11.1)              | 60.2 (11.9)                 | <0.001                 |
| <b>Sex</b>                                 |                          |                             |                        |
| Males                                      | 681 (69.2)               | 643 (37.7)                  |                        |
| Females                                    | 303 (30.8)               | 1,063 (62.3)                | <0.001                 |
| <b>Region</b>                              |                          |                             |                        |
| Madrid                                     | 139 (14.1)               | 429 (25.2)                  |                        |
| Barcelona                                  | 262 (26.6)               | 303 (17.8)                  |                        |
| Navarra                                    | 57 (5.8)                 | 144 (8.4)                   |                        |
| Guipuzcoa                                  | 69 (7.0)                 | 206 (12.1)                  |                        |
| Leon                                       | 126 (12.8)               | 151 (8.9)                   |                        |
| Asturias                                   | 57 (5.8)                 | 88 (5.2)                    |                        |
| Murcia                                     | 15 (1.5)                 | 14 (0.8)                    |                        |
| Huelva                                     | 56 (5.7)                 | 59 (3.5)                    |                        |
| Cantabria                                  | 111 (11.3)               | 160 (9.4)                   |                        |
| Valencia                                   | 29 (3.0)                 | 77 (4.5)                    |                        |
| Granada                                    | 63 (6.4)                 | 75 (4.4)                    | <0.001                 |
| <b>Education</b>                           |                          |                             |                        |
| Less than primary school                   | 251 (25.5)               | 159 (9.3)                   |                        |
| Primary school                             | 400 (40.7)               | 373 (21.9)                  |                        |
| Secondary school                           | 221 (22.5)               | 616 (36.1)                  |                        |
| University                                 | 112 (11.4)               | 558 (32.7)                  | <0.001                 |
| <b>Smoking</b>                             |                          |                             |                        |
| Never smoker                               | 366 (37.2)               | 767 (45.0)                  |                        |
| Ex-smoker                                  | 402 (40.9)               | 580 (34.0)                  |                        |
| Current smoker                             | 216 (22.0)               | 359 (21.0)                  | <0.001                 |
| <b>Family history of colorectal cancer</b> |                          |                             |                        |
| No                                         | 864 (87.8)               | 1,477 (86.6)                |                        |
| Yes                                        | 76 (7.7)                 | 157 (9.2)                   |                        |
| Missing                                    | 44 (4.5)                 | 72 (4.2)                    | 0.41                   |
| <b>BMI (kg/cm<sup>2</sup>); mean (SD)</b>  | 27.4 (4.4)               | 25.9 (4.4)                  | <0.001                 |
| <b>Physical activity at work</b>           |                          |                             |                        |
| Sedentary                                  | 78 (7.9)                 | 443 (26.0)                  |                        |
| Low active                                 | 99 (10.1)                | 292 (17.1)                  |                        |
| Moderately active                          | 320 (32.5)               | 535 (31.4)                  |                        |
| Vigorously active                          | 291 (29.6)               | 295 (17.3)                  |                        |
| Extremely active                           | 196 (19.9)               | 141 (8.3)                   | <0.001                 |

Wilcoxon rank-sum for continuous and chi-square for categorical

Numbers may differ due to missing values; SD: standard deviation

**Table S2.** The five most common jobs, the five most heat exposed jobs and the five most common heat exposed jobs

|                                                                                                      | <b>Job Code</b> | <b>Level (%)</b> | <b>Proportion (%)</b> | <b>Proportion of all jobs (%)</b> |
|------------------------------------------------------------------------------------------------------|-----------------|------------------|-----------------------|-----------------------------------|
| <b>Five most common jobs</b>                                                                         |                 |                  |                       |                                   |
| Administrative assistants without front-office duties not classified above                           | 4300            | 0                | 0                     | 6.87                              |
| Shop assistants and display clerks in shops, stores, kiosks and markets                              | 5330            | 0                | 0                     | 6.31                              |
| Sales representatives and sales technicians                                                          | 3320            | 0                | 0                     | 3.55                              |
| Domestic workers                                                                                     | 9110            | 0                | 0                     | 2.91                              |
| Waiters, waitresses, bartenders and the like                                                         | 5020            | 25               | 25                    | 2.56                              |
| <b>Five most heat exposed jobs</b>                                                                   |                 |                  |                       |                                   |
| Operators in ore furnaces and primary metal melting furnaces                                         | 8121            | 100              | 100                   | 0.27                              |
| Operators in secondary melting furnaces, metal casting and moulding machines; rolling mill operators | 8122            | 100              | 100                   | 0.23                              |
| Operators of glassmaking and ceramics kilns and similar machinery                                    | 8131            | 100              | 100                   | 0.14                              |
| Blacksmiths and smiths                                                                               | 7521            | 100              | 100                   | 0.13                              |
| Boiler and steam engine operators                                                                    | 8162            | 100              | 100                   | 0.10                              |
| <b>Five most common heat exposed jobs</b>                                                            |                 |                  |                       |                                   |
| Waiters, waitresses, bartenders and the like                                                         | 5020            | 25               | 25                    | 2.56                              |
| Skilled own-account workers in agricultural activities, except in orchards, nurseries and gardens    | 6011            | 35               | 100                   | 2.22                              |
| Cooks and other food preparers                                                                       | 5010            | 60               | 70                    | 1.78                              |
| Bricklayers and masons                                                                               | 7110            | 25               | 100                   | 1.68                              |
| Labourers in manufacturing industries                                                                | 9700            | 25               | 30                    | 1.40                              |

**Table S3:** Associations between colorectal cancer and occupational heat exposure for participants never/ever exposed to metals (OR: Odds Ratio; 95% CI: 95% Confidence Interval)

|                                                 | Never metals       |                  | Ever metals        |                  | P-values for interaction |
|-------------------------------------------------|--------------------|------------------|--------------------|------------------|--------------------------|
|                                                 | Cases/Controls (N) | OR (95% CI)      | Cases/Controls (N) | OR (95% CI)      |                          |
| <b>Never heat exposure</b>                      | 521/1,591          | 1 (ref)          | 64/113             | 1 (ref)          |                          |
| <b>Ever heat exposure</b>                       | 276/465            | 1.21 (0.98-1.49) | 567/861            | 0.96 (0.68-1.36) | 0.22                     |
| <b>Lifetime Cumulative Exposure<sup>a</sup></b> |                    |                  |                    |                  |                          |
| Low                                             | 104/217            | 1.24 (0.94-1.63) | 159/260            | 1.07 (0.72-1.57) |                          |
| Medium                                          | 92/155             | 1.12 (0.82-1.53) | 195/320            | 0.92 (0.63-1.35) |                          |
| High                                            | 80/93              | 1.27 (0.88-1.82) | 213/281            | 0.88 (0.60-1.31) |                          |
| <i>P-trend</i>                                  |                    | 0.13             |                    | 0.29             | 0.13                     |
| <b>Duration (Years)<sup>b</sup></b>             |                    |                  |                    |                  |                          |
| >0 - <15                                        | 121/256            | 1.23 (0.96-1.60) | 156/276            | 0.96 (0.65-1.41) |                          |
| >= 15 - <30                                     | 50/91              | 1.07 (0.73-1.58) | 121/172            | 1.05 (0.70-1.58) |                          |
| >=30                                            | 105/118            | 1.25 (0.90-1.75) | 290/413            | 0.91 (0.63-1.33) |                          |
| <i>P-trend</i>                                  |                    | 0.14             |                    | 0.63             | 0.16                     |

Adjusted for age, sex, region, education, cigarette smoking, family history of colorectal cancer, BMI and occupational physical activity

<sup>a</sup>P\*L\*duration in years, cut points based on those of the overall population

<sup>b</sup>Based on the tertiles according to the distribution amongst exposed controls

P-value of 5 for heat and metal exposure

\*lead, cadmium, chromium, nickel, iron

**Table S4.** Associations between colorectal cancer and occupational heat exposure for participants never/ever exposed to solvents (OR: Odds Ratio; 95% CI: 95% Confidence Interval)

|                                                 | Never solvents     |                  | Ever solvents      |                  | P-values for interaction |
|-------------------------------------------------|--------------------|------------------|--------------------|------------------|--------------------------|
|                                                 | Cases/Controls (N) | OR (95% CI)      | Cases/Controls (N) | OR (95% CI)      |                          |
| <b>Never heat exposure</b>                      | 533/1,595          | 1 (ref)          | 52/110             | 1 (ref)          |                          |
| <b>Ever heat exposure</b>                       | 691/1,062          | 1.10 (0.92-1.30) | 154/262            | 1.22 (0.79-1.87) | 0.93                     |
| <b>Lifetime Cumulative Exposure<sup>a</sup></b> |                    |                  |                    |                  |                          |
| Low                                             | 203/391            | 1.17 (0.95-1.45) | 60/87              | 1.64 (0.99-2.72) |                          |
| Medium                                          | 234/352            | 1.08 (0.86-1.35) | 55/122             | 0.88 (0.53-1.46) |                          |
| High                                            | 254/319            | 0.99 (0.77-1.26) | 39/53              | 1.29 (0.71-2.33) |                          |
| <i>P-trend</i>                                  |                    | 0.94             |                    | 1.00             | 0.09                     |
| <b>Duration (Years)<sup>b</sup></b>             |                    |                  |                    |                  |                          |
| >0 - <15                                        | 214/424            | 1.15 (0.93-1.42) | 63/109             | 1.31 (0.80-2.16) |                          |
| >= 15 - <30                                     | 130/193            | 1.15 (0.87-1.51) | 42/69              | 1.30 (0.75-2.28) |                          |
| >=30                                            | 347/445            | 1.00 (0.80-1.25) | 49/84              | 1.02 (0.59-1.76) |                          |
| <i>P-trend</i>                                  |                    | 0.92             |                    | 0.94             | 0.35                     |

Adjusted for age, sex, region, education, cigarette smoking, family history of colorectal cancer, BMI and occupational physical activity

<sup>a</sup>P\*L\*duration in years, cut points based on those of the overall population

<sup>b</sup>Based on the tertiles according to the distribution amongst exposed controls

P-value of 5 for heat and solvent exposure

\*aliphatic and alicyclic hydrocarbons, aromatic hydrocarbons, chlorinated hydrocarbons, and other organic solvents

**Table S5.** Associations between colorectal cancer and occupational heat exposure for participants never/ever exposed to pesticides (OR: Odds Ratio; 95% CI: 95% Confidence Interval)

|                                                 | Never Pesticides   |                  | Ever Pesticides    |                  | P-values for interaction |
|-------------------------------------------------|--------------------|------------------|--------------------|------------------|--------------------------|
|                                                 | Cases/Controls (N) | OR (95% CI)      | Cases/Controls (N) | OR (95% CI)      |                          |
| <b>Never heat exposure</b>                      | 543/1,617          | 1 (ref)          | 41/86              | 1 (ref)          |                          |
| <b>Ever heat exposure</b>                       | 533/862            | 1.12 (0.94-1.33) | 307/464            | 1.27 (0.78-2.09) | 0.46                     |
| <b>Lifetime Cumulative Exposure<sup>a</sup></b> |                    |                  |                    |                  |                          |
| Low                                             | 198/340            | 1.28 (1.03-1.59) | 64/138             | 1.19 (0.69-2.06) |                          |
| Medium                                          | 184/294            | 1.08 (0.85-1.37) | 103/180            | 1.20 (0.69-2.08) |                          |
| High                                            | 151/228            | 0.89 (0.68-1.17) | 140/146            | 1.60 (0.90-2.84) |                          |
| <i>P-trend</i>                                  |                    | 0.74             |                    | 0.09             | 0.09                     |
| <b>Duration (Years)<sup>b</sup></b>             |                    |                  |                    |                  |                          |
| >0 - <15                                        | 182/351            | 1.21 (0.97-1.50) | 94/182             | 1.24 (0.74-2.06) |                          |
| >= 15 - <30                                     | 119/179            | 1.21 (0.91-1.60) | 52/84              | 1.25 (0.67-2.32) |                          |
| >=30                                            | 232/332            | 0.96 (0.76-1.22) | 161/198            | 1.45 (0.81-2.59) |                          |
| <i>P-trend</i>                                  |                    | 0.97             |                    | 0.24             | 0.40                     |

Adjusted for age, sex, region, education, cigarette smoking, family history of colorectal cancer, BMI and occupational physical activity

<sup>a</sup>P\*L\*duration in years, cut points based on those of the overall population

<sup>b</sup>Based on the tertiles according to the distribution amongst exposed controls

P-value of 5 for heat and pesticide exposure

\*2,4-D, atrazine, captan, chlorpyrifos, dicuat, diuron, endosulfan, methomyl, pyrethrin, tiram

**Table S6.** Associations between colorectal cancer and occupational heat exposure for participants never/ever exposed to polycyclic aromatic hydrocarbons (PAHs) (OR: Odds Ratio; 95% CI: 95% Confidence Interval)

|                                                 | Never PAHs         |                  | Ever PAHs          |                  | P-values for interaction |
|-------------------------------------------------|--------------------|------------------|--------------------|------------------|--------------------------|
|                                                 | Cases/Controls (N) | OR (95% CI)      | Cases/Controls (N) | OR (95% CI)      |                          |
| <b>Never heat exposure</b>                      | 551/1,646          | 1 (ref)          | 34/60              | 1 (ref)          |                          |
| <b>Ever heat exposure</b>                       | 637/1,009          | 1.14 (0.96-1.35) | 204/317            | 1.00 (0.61-1.65) | 0.58                     |
| <b>Lifetime Cumulative Exposure<sup>a</sup></b> |                    |                  |                    |                  |                          |
| Low                                             | 205/402            | 1.18 (0.95-1.46) | 56/76              | 1.40 (0.77-2.54) |                          |
| Medium                                          | 224/352            | 1.10 (0.88-1.38) | 63/122             | 0.84 (0.48-1.48) |                          |
| High                                            | 208/255            | 1.11 (0.86-1.43) | 85/119             | 0.91 (0.52-1.60) |                          |
| <i>P-trend</i>                                  |                    | 0.35             |                    | 0.34             | 0.10                     |
| <b>Duration (Years)<sup>b</sup></b>             |                    |                  |                    |                  |                          |
| >0 - <15                                        | 215/447            | 1.14 (0.93-1.40) | 59/86              | 1.23 (0.68-2.21) |                          |
| >= 15 - <30                                     | 115/184            | 1.18 (0.89-1.56) | 56/79              | 1.13 (0.63-2.04) |                          |
| >=30                                            | 307/378            | 1.11 (0.88-1.40) | 89/152             | 0.81 (0.47-1.40) |                          |
| <i>P-trend</i>                                  |                    | 0.30             |                    | 0.21             | 0.18                     |

Adjusted for age, sex, region, education, cigarette smoking, family history of colorectal cancer, BMI and occupational physical activity

<sup>a</sup>P\*L\*duration in years, cut points based on those of the overall population

<sup>b</sup>Based on the tertiles according to the distribution amongst exposed controls

P-value of 5 for heat and PAH exposure

**Table S7.** Associations between colorectal cancer and occupational heat exposure for participants never/ever exposed to detergents (OR: Odds Ratio; 95% CI: 95% Confidence Interval)

|                                                 | Never detergents   |                  | Ever detergents    |                  | P-values for interaction |
|-------------------------------------------------|--------------------|------------------|--------------------|------------------|--------------------------|
|                                                 | Cases/Controls (N) | OR (95% CI)      | Cases/Controls (N) | OR (95% CI)      |                          |
| <b>Never heat exposure</b>                      | 414/1,244          | 1 (ref)          | 171/456            | 1 (ref)          |                          |
| <b>Ever heat exposure</b>                       | 336/462            | 1.09 (0.87-1.38) | 504/865            | 1.24 (0.97-1.58) | 0.54                     |
| <b>Lifetime Cumulative Exposure<sup>a</sup></b> |                    |                  |                    |                  |                          |
| Low                                             | 116/192            | 1.18 (0.89-1.57) | 144/286            | 1.36 (1.02-1.82) |                          |
| Medium                                          | 117/153            | 1.09 (0.80-1.50) | 170/322            | 1.10 (0.82-1.49) |                          |
| High                                            | 103/117            | 0.92 (0.65-1.32) | 190/257            | 1.23 (0.90-1.68) |                          |
| P-trend                                         |                    | 0.96             |                    | 0.34             | 0.21                     |
| <b>Duration (Years)<sup>b</sup></b>             |                    |                  |                    |                  |                          |
| >0 - <15                                        | 91/163             | 1.15 (0.85-1.57) | 182/370            | 1.27 (0.97-1.67) |                          |
| >= 15 - <30                                     | 59/90              | 1.08 (0.73-1.60) | 113/173            | 1.36 (0.98-1.90) |                          |
| >=30                                            | 209/186            | 1.05 (0.78-1.40) | 209/322            | 1.08 (0.79-1.48) |                          |
| P-trend                                         |                    | 0.71             |                    | 0.68             | 0.2                      |

Adjusted for age, sex, region, education, cigarette smoking, family history of colorectal cancer, BMI and occupational physical activity

<sup>a</sup>P\*L\*duration in years, cut points based on those of the overall population

<sup>b</sup>Based on the tertiles according to the distribution amongst exposed controls

P-value of 5 for heat and detergent exposure

**Table S8.** Associations between occupational heat exposure and colorectal cancer stratified by time since last heat exposure (OR: Odds Ratio; 95% CI: 95% Confidence Interval)

|                                                 | Last heat exposure $\geq 5$ & <10 years ago |                  | Last heat exposure $\geq 10$ & <20 years ago |                  | Last heat exposure $\geq 20$ years ago |                  |
|-------------------------------------------------|---------------------------------------------|------------------|----------------------------------------------|------------------|----------------------------------------|------------------|
|                                                 | Cases/Controls (N)                          | OR (95% CI)      | Cases/Controls (N)                           | OR (95% CI)      | Cases/Controls (N)                     | OR (95% CI)      |
| <b>Never heat exposure</b>                      | 585/1,706                                   | 1 (ref)          | 585/1,706                                    | 1 (ref)          | 585/1,706                              | 1 (ref)          |
| <b>Ever heat exposure</b>                       | 224/403                                     | 1.10 (0.87-1.39) | 153/197                                      | 1.11 (0.84-1.47) | 236/384                                | 1.06 (0.85-1.32) |
| <b>Lifetime Cumulative Exposure<sup>a</sup></b> |                                             |                  |                                              |                  |                                        |                  |
| Low                                             | 37/86                                       | 1.53 (0.99-2.34) | 24/51                                        | 1.47 (0.87-2.47) | 92/191                                 | 1.02 (0.77-1.35) |
| Medium                                          | 74/139                                      | 1.07 (0.76-1.51) | 35/50                                        | 1.09 (0.68-1.76) | 89/139                                 | 1.07 (0.78-1.46) |
| High                                            | 113/178                                     | 0.96 (0.71-1.30) | 94/96                                        | 0.99 (0.69-1.42) | 55/54                                  | 1.18 (0.76-1.81) |
| <i>P-trend</i>                                  |                                             | 0.97             |                                              | 0.80             |                                        | 0.47             |
| <b>Duration (Years)<sup>b</sup></b>             |                                             |                  |                                              |                  |                                        |                  |
| >0 - <15                                        | 39/103                                      | 1.29 (0.85-1.94) | 27/56                                        | 1.50 (0.90-2.48) | 157/292                                | 1.07 (0.84-1.35) |
| $\geq 15$ - <30                                 | 50/85                                       | 1.34 (0.90-1.99) | 29/37                                        | 1.28 (0.75-2.18) | 40/63                                  | 0.86 (0.55-1.34) |
| $\geq 30$                                       | 135/215                                     | 0.95 (0.71-1.27) | 97/104                                       | 0.92 (0.64-1.31) | 39/29                                  | 1.41 (0.82-2.42) |
| <i>P-trend</i>                                  |                                             | 0.92             |                                              | 0.96             |                                        | 0.49             |

All models are adjusted for age, sex, region, education, cigarette smoking, family history of colorectal cancer, BMI and occupational physical activity

<sup>a</sup>P\*L\*duration in years, cut points based on those of the controls overall

<sup>b</sup>Based on the tertiles according to the distribution amongst exposed controls

**Table S9.** Association between occupational heat exposure and colorectal cancer using different combinations of lag years, durations and proportion thresholds

|                                                 | <b>P-threshold 5 &amp; duration at least 1 year &amp; lag 1 year</b> | <b>P-threshold 5 &amp; duration at least 5 years &amp; lag 1 year</b> | <b>P-threshold 25 &amp; duration at least 1 year &amp; lag 1 year</b> | <b>P-threshold 25 &amp; duration at least 5 years &amp; lag 1 year</b> | <b>P-threshold 50 &amp; duration at least 1 year &amp; lag 1 year</b> | <b>P-threshold 50 &amp; duration at least 5 years &amp; lag 1 year</b> |
|-------------------------------------------------|----------------------------------------------------------------------|-----------------------------------------------------------------------|-----------------------------------------------------------------------|------------------------------------------------------------------------|-----------------------------------------------------------------------|------------------------------------------------------------------------|
|                                                 | <b>OR (95% CI)</b>                                                   | <b>OR (95% CI)</b>                                                    | <b>OR (95% CI)</b>                                                    | <b>OR (95% CI)</b>                                                     | <b>OR (95% CI)</b>                                                    | <b>OR (95% CI)</b>                                                     |
| <b>Controls/cases (N)</b>                       | 3,045/1,434                                                          | 2,837/1,335                                                           | 2,697/1,200                                                           | 2,518/1,121                                                            | 2,366/1,032                                                           | 2,260/980                                                              |
| <b>Never heat exposure</b>                      | 1 (ref)                                                              | 1 (ref)                                                               | 1 (ref)                                                               | 1 (ref)                                                                | 1 (ref)                                                               | 1 (ref)                                                                |
| <b>Ever heat exposure</b>                       | 1.12 (0.96-1.31)                                                     | 1.11 (0.94-1.32)                                                      | 1.09 (0.92-1.29)                                                      | 1.09 (0.91-1.31)                                                       | 1.07 (0.88-1.29)                                                      | 1.06 (0.87-1.30)                                                       |
| <b>Lifetime Cumulative Exposure<sup>a</sup></b> |                                                                      |                                                                       |                                                                       |                                                                        |                                                                       |                                                                        |
| Low                                             | 1.21 (1.00-1.48)                                                     | 1.24 (0.98-1.57)                                                      | 1.15 (0.91-1.44)                                                      | 1.21 (0.89-1.63)                                                       | 1.11 (0.81-1.51)                                                      | 1.09 (0.68-1.74)                                                       |
| Medium                                          | 1.06 (0.86-1.30)                                                     | 1.07 (0.87-1.32)                                                      | 1.07 (0.85-1.35)                                                      | 1.08 (0.85-1.36)                                                       | 1.06 (0.82-1.38)                                                      | 1.08 (0.83-1.41)                                                       |
| High                                            | 1.05 (0.84-1.31)                                                     | 1.05 (0.84-1.31)                                                      | 1.04 (0.83-1.31)                                                      | 1.04 (0.82-1.31)                                                       | 1.05 (0.82-1.34)                                                      | 1.04 (0.81-1.34)                                                       |
| <i>P-trend</i>                                  | 0.67                                                                 | 0.68                                                                  | 0.63                                                                  | 0.65                                                                   | 0.65                                                                  | 0.66                                                                   |
| <b>Duration (Years)<sup>b</sup></b>             |                                                                      |                                                                       |                                                                       |                                                                        |                                                                       |                                                                        |
| >0 - <15                                        | 1.18 (0.98-1.43)                                                     | 1.20 (0.96-1.51)                                                      | 1.14 (0.93-1.40)                                                      | 1.19 (0.93-1.52)                                                       | 1.06 (0.83-1.35)                                                      | 1.05 (0.77-1.42)                                                       |
| >= 15 - <30                                     | 1.10 (0.86-1.41)                                                     | 1.10 (0.86-1.41)                                                      | 1.09 (0.83-1.45)                                                      | 1.09 (0.83-1.45)                                                       | 1.15 (0.83-1.59)                                                      | 1.15 (0.83-1.59)                                                       |
| >=30                                            | 1.05 (0.86-1.29)                                                     | 1.05 (0.85-1.29)                                                      | 1.01 (0.80-1.27)                                                      | 1.00 (0.80-1.27)                                                       | 1.04 (0.81-1.33)                                                      | 1.03 (0.80-1.33)                                                       |
| <i>P-trend</i>                                  | 0.66                                                                 | 0.67                                                                  | 0.84                                                                  | 0.88                                                                   | 0.64                                                                  | 0.69                                                                   |

All models are adjusted for age, sex, region, education, cigarette smoking, family history of colorectal cancer, BMI and occupational physical activity

<sup>a</sup>P\*L\*duration in years, cut points based on those of the controls overall

<sup>b</sup>Based on the tertiles according to the distribution amongst exposed controls



**Table S10.** Association between occupational heat exposure and colorectal cancer using different combinations of lag years, durations and proportion thresholds

|                                                 | <b>P-threshold 5 &amp; duration at least 1 year &amp; lag 5 years</b> | <b>P-threshold 5 &amp; duration at least 5 years &amp; lag 5 years</b> | <b>P-threshold 25 &amp; duration at least 5 years &amp; lag 5 years</b> | <b>P-threshold 50 &amp; duration at least 1 year &amp; lag 5 years</b> | <b>P-threshold 50 &amp; duration at least 5 years &amp; lag 5 years</b> |
|-------------------------------------------------|-----------------------------------------------------------------------|------------------------------------------------------------------------|-------------------------------------------------------------------------|------------------------------------------------------------------------|-------------------------------------------------------------------------|
|                                                 | <b>OR (95% CI)</b>                                                    | <b>OR (95% CI)</b>                                                     | <b>OR (95% CI)</b>                                                      | <b>OR (95% CI)</b>                                                     | <b>OR (95% CI)</b>                                                      |
| <b>Controls/cases (N)</b>                       | 3,033/1,430                                                           | 2,819/1,328                                                            | 2,501/1,117                                                             | 2,365/1,033                                                            | 2,250/980                                                               |
| <b>Never heat exposure</b>                      | 1 (ref)                                                               | 1 (ref)                                                                | 1 (ref)                                                                 | 1 (ref)                                                                | 1 (ref)                                                                 |
| <b>Ever heat exposure</b>                       | 1.12 (0.96-1.31)                                                      | 1.12 (0.95-1.33)                                                       | 1.10 (0.92-1.33)                                                        | 1.06 (0.88-1.29)                                                       | 1.08 (0.88-1.32)                                                        |
| <b>Lifetime Cumulative Exposure<sup>a</sup></b> |                                                                       |                                                                        |                                                                         |                                                                        |                                                                         |
| Low                                             | 1.24 (1.03-1.51)                                                      | 1.29 (1.02-1.63)                                                       | 1.26 (0.93-1.70)                                                        | 1.11 (0.82-1.51)                                                       | 1.17 (0.73-1.87)                                                        |
| Medium                                          | 1.03 (0.84-1.26)                                                      | 1.05 (0.85-1.30)                                                       | 1.08 (0.86-1.37)                                                        | 1.08 (0.83-1.40)                                                       | 1.11 (0.85-1.45)                                                        |
| High                                            | 1.03 (0.83-1.29)                                                      | 1.04 (0.83-1.30)                                                       | 1.04 (0.82-1.31)                                                        | 1.02 (0.79-1.31)                                                       | 1.02 (0.79-1.32)                                                        |
| <i>P-trend</i>                                  | 0.83                                                                  | 0.77                                                                   | 0.64                                                                    | 0.74                                                                   | 0.70                                                                    |
| <b>Duration (Years)<sup>b</sup></b>             |                                                                       |                                                                        |                                                                         |                                                                        |                                                                         |
| >0 - <15                                        | 1.18 (0.97-1.42)                                                      | 1.20 (0.95-1.50)                                                       | 1.20 (0.94-1.53)                                                        | 1.05 (0.82-1.33)                                                       | 1.07 (0.79-1.44)                                                        |
| >= 15 - <30                                     | 1.16 (0.92-1.48)                                                      | 1.17 (0.92-1.50)                                                       | 1.12 (0.85-1.48)                                                        | 1.18 (0.86-1.63)                                                       | 1.18 (0.85-1.63)                                                        |
| >=30                                            | 1.02 (0.83-1.25)                                                      | 1.02 (0.83-1.26)                                                       | 1.01 (0.80-1.28)                                                        | 1.03 (0.79-1.33)                                                       | 1.03 (0.79-1.33)                                                        |
| <i>P-trend</i>                                  | 0.78                                                                  | 0.73                                                                   | 0.81                                                                    | 0.66                                                                   | 0.67                                                                    |

All models are adjusted for age, sex, region, education, cigarette smoking, family history of colorectal cancer, BMI and occupational physical activity

<sup>a</sup>P\*L\*duration in years, cut points based on those of the controls overall

<sup>b</sup>Based on the tertiles according to the distribution amongst exposed controls

**Table S11.** Association between occupational heat exposure and colorectal cancer using different combinations of lag years, durations and proportion thresholds

|                                                 | <b>P-threshold 5 &amp; duration at least 1 year &amp; lag 10 years</b> | <b>P-threshold 5 &amp; duration at least 5 years &amp; lag 10 years</b> | <b>P-threshold 25 &amp; duration at least 1 year &amp; lag 10 years</b> | <b>P-threshold 25 &amp; duration at least 5 years &amp; lag 10 years</b> | <b>P-threshold 50 &amp; duration at least 1 year &amp; lag 10 years</b> | <b>P-threshold 50 &amp; duration at least 5 years &amp; lag 10 years</b> |
|-------------------------------------------------|------------------------------------------------------------------------|-------------------------------------------------------------------------|-------------------------------------------------------------------------|--------------------------------------------------------------------------|-------------------------------------------------------------------------|--------------------------------------------------------------------------|
|                                                 | <b>OR (95% CI)</b>                                                     | <b>OR (95% CI)</b>                                                      | <b>OR (95% CI)</b>                                                      | <b>OR (95% CI)</b>                                                       | <b>OR (95% CI)</b>                                                      | <b>OR (95% CI)</b>                                                       |
| <b>Controls/cases (N)</b>                       | 2,990/1,418                                                            | 2,776/1,311                                                             | 2,653/1,193                                                             | 2,467/1,105                                                              | 2,342/1,033                                                             | 2,228/976                                                                |
| <b>Never heat exposure</b>                      | 1 (ref)                                                                | 1 (ref)                                                                 | 1 (ref)                                                                 | 1 (ref)                                                                  | 1 (ref)                                                                 | 1 (ref)                                                                  |
| <b>Ever heat exposure</b>                       | 1.13 (0.96-1.32)                                                       | 1.10 (0.93-1.31)                                                        | 1.11 (0.93-1.31)                                                        | 1.09 (0.90-1.31)                                                         | 1.10 (0.91-1.33)                                                        | 1.08 (0.88-1.33)                                                         |
| <b>Lifetime Cumulative Exposure<sup>a</sup></b> |                                                                        |                                                                         |                                                                         |                                                                          |                                                                         |                                                                          |
| Low                                             | 1.22 (1.01-1.48)                                                       | 1.23 (0.97-1.55)                                                        | 1.14 (0.90-1.43)                                                        | 1.12 (0.82-1.52)                                                         | 1.11 (0.82-1.51)                                                        | 1.08 (0.67-1.72)                                                         |
| Medium                                          | 1.07 (0.87-1.31)                                                       | 1.07 (0.86-1.32)                                                        | 1.15 (0.91-1.44)                                                        | 1.15 (0.91-1.45)                                                         | 1.19 (0.92-1.54)                                                        | 1.19 (0.91-1.55)                                                         |
| High                                            | 1.03 (0.82-1.30)                                                       | 1.02 (0.81-1.29)                                                        | 1.02 (0.81-1.30)                                                        | 1.01 (0.79-1.29)                                                         | 1.02 (0.79-1.31)                                                        | 1.00 (0.77-1.29)                                                         |
| <i>P-trend</i>                                  | 0.74                                                                   | 0.83                                                                    | 0.56                                                                    | 0.67                                                                     | 0.57                                                                    | 0.70                                                                     |
| <b>Duration (Years)<sup>b</sup></b>             |                                                                        |                                                                         |                                                                         |                                                                          |                                                                         |                                                                          |
| >0 - <15                                        | 1.18 (0.98-1.43)                                                       | 1.16 (0.93-1.46)                                                        | 1.14 (0.93-1.40)                                                        | 1.13 (0.88-1.44)                                                         | 1.12 (0.88-1.43)                                                        | 1.12 (0.83-1.50)                                                         |
| >= 15 - <30                                     | 1.21 (0.96-1.53)                                                       | 1.22 (0.96-1.54)                                                        | 1.23 (0.94-1.61)                                                        | 1.23 (0.94-1.61)                                                         | 1.18 (0.87-1.61)                                                        | 1.18 (0.86-1.61)                                                         |
| >=30                                            | 0.98 (0.79-1.22)                                                       | 0.97 (0.78-1.21)                                                        | 0.96 (0.76-1.23)                                                        | 0.95 (0.74-1.21)                                                         | 1.02 (0.78-1.33)                                                        | 1.00 (0.76-1.31)                                                         |
| <i>P-trend</i>                                  | 0.91                                                                   | 0.98                                                                    | 0.85                                                                    | 0.98                                                                     | 0.63                                                                    | 0.77                                                                     |

All models are adjusted for age, sex, region, education, cigarette smoking, family history of colorectal cancer, BMI and occupational physical activity

<sup>a</sup>P\*L\*duration in years, cut points based on those of the controls overall

<sup>b</sup>Based on the tertiles according to the distribution amongst exposed controls
